# Supplementary material
Source: PubMed Central journal article supplement (PMC3129915)
Supplement: supp_00133.2011_supfigs.pdf [file supp_00133.2011_supfigs.pdf]

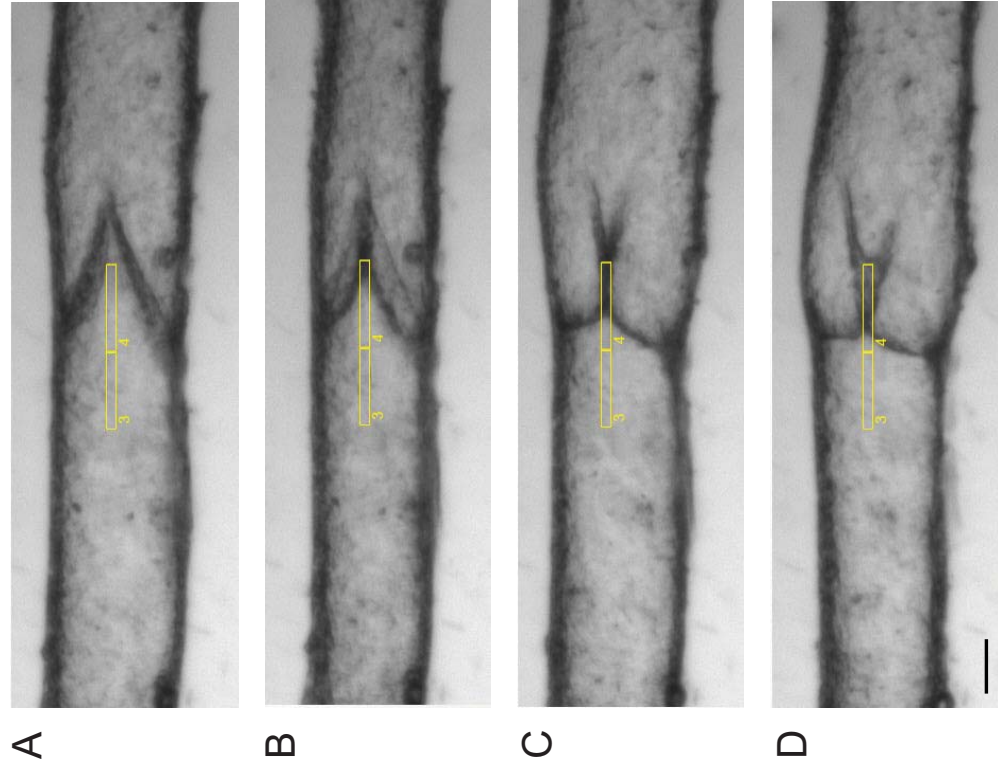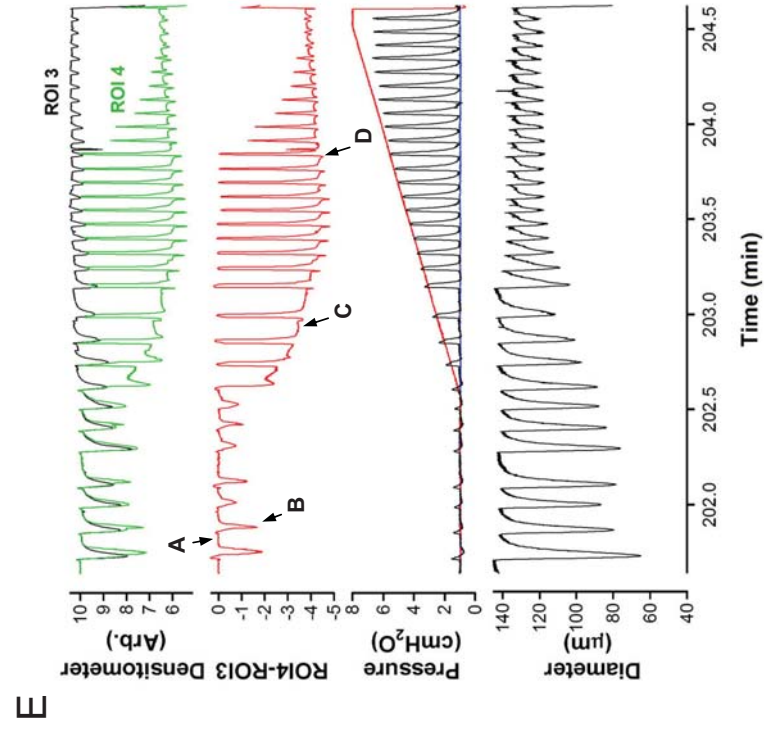

Suppl. Fig. 1 Densitometer window positions for optimal valve gating recording

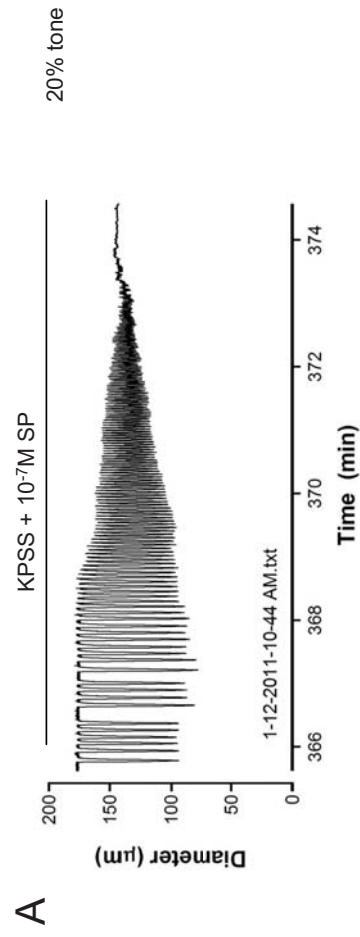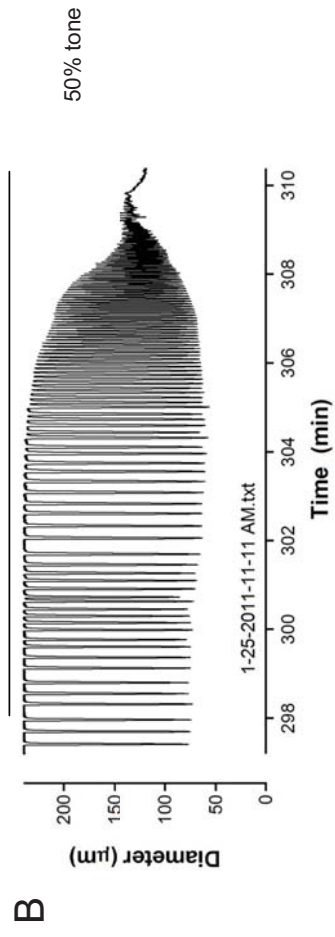

Suppl. Fig. 2 Time course of tone development and cessation of contractions after switching to KPSS solution +SP

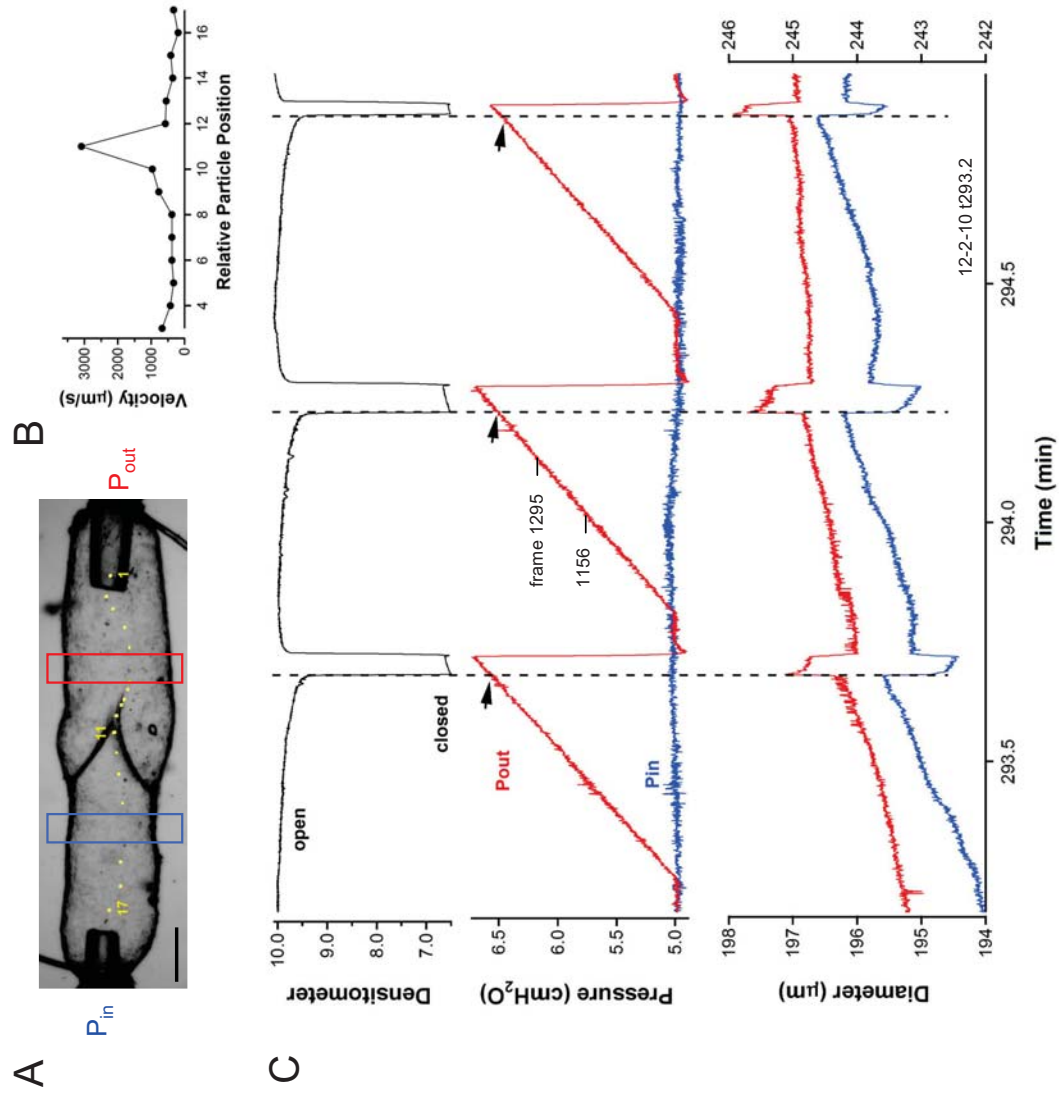

Suppl. Fig. 3 Particle tracking through a valve in the presence of an adverse pressure gradient

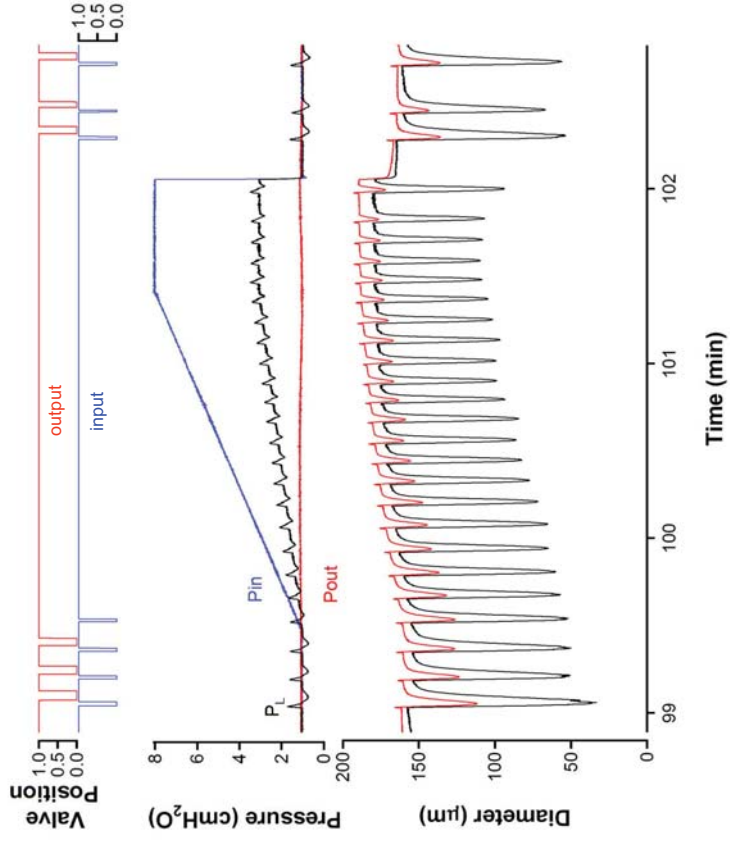

Suppl. Fig. 4 Pressures, diameters and valve timing during a  $P_{in}$  ramp

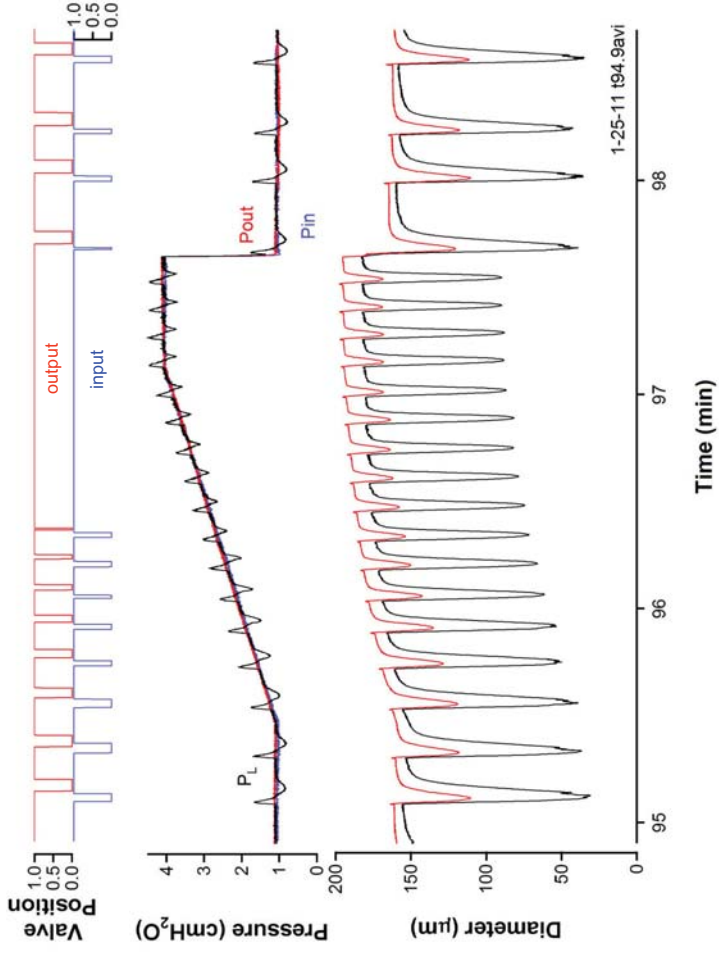

Suppl. Fig. 5 Pressures, diameters and valve timing during a simultaneous P<sub>in</sub>+P<sub>out</sub> ramp
